# Supplementary material for: Accurate predictions of population-level changes in sequence and structural properties of HIV-1 Env using a volatility-controlled diffusion model
Source: PubMed Central journal article supplement (PMC5383018; doi:10.1371/journal.pbio.2001549), 2017-04-06

**Frequency**

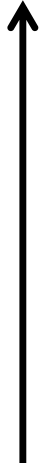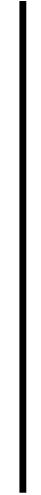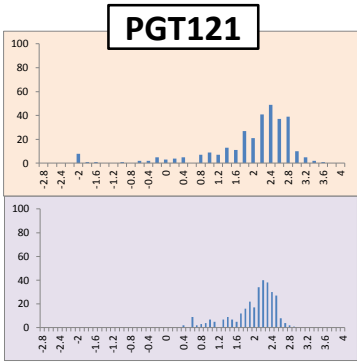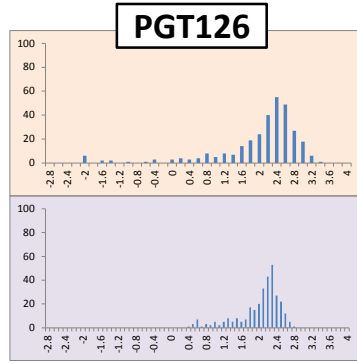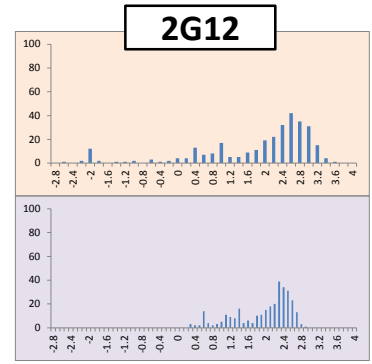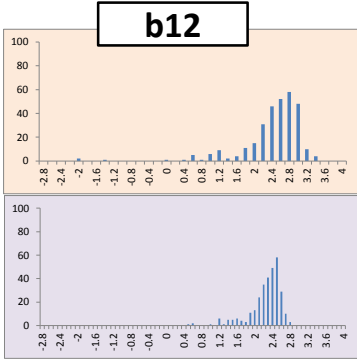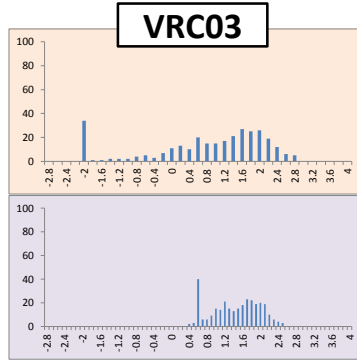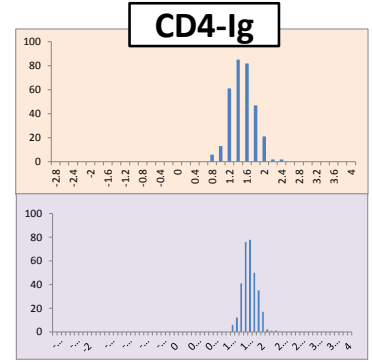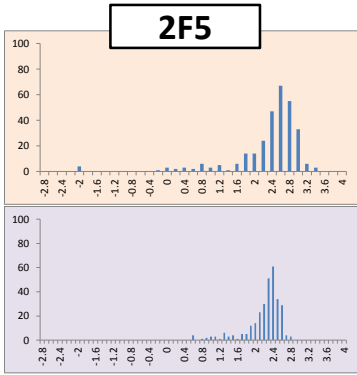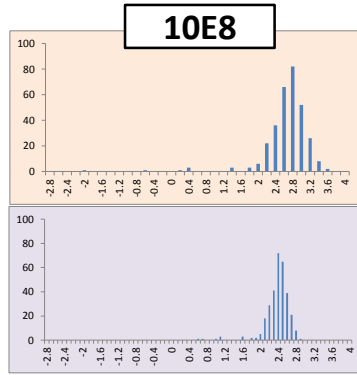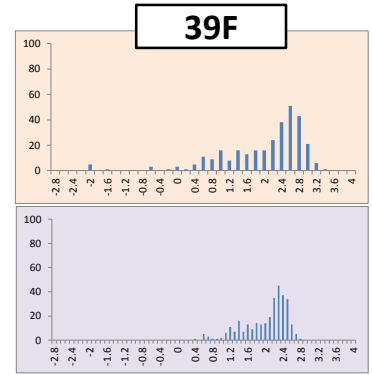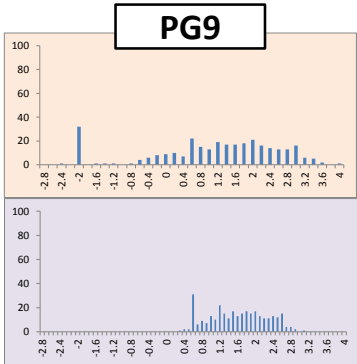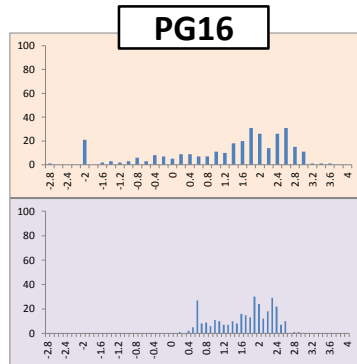

**Log-transformed values**

**Logistic function-corrected values**

**Probe Binding**

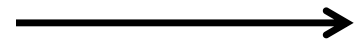

Supplement: pbio.2001549.s002.pdf [file pbio.2001549.s002.pdf]
