# Supplementary material for: Accurate predictions of population-level changes in sequence and structural properties of HIV-1 Env using a volatility-controlled diffusion model
Source: PubMed Central journal article supplement (PMC5383018; doi:10.1371/journal.pbio.2001549), 2017-04-06

**A**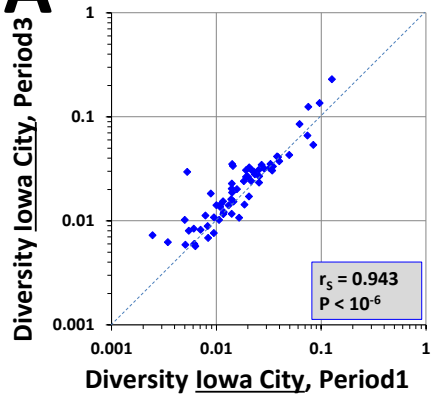

| Segment | Residues |
|---------|----------|
| SP      | 1-30     |
| C1      | 31-130   |
| V1      | 131-157  |
| V2      | 158-196  |
| C2      | 197-295  |
| V3      | 296-331  |
| C3      | 332-384  |
| V4      | 385-418  |
| C4      | 419-459  |
| V5      | 460-469  |
| C5      | 470-511  |
| FP      | 512-527  |
| Polar   | 528-539  |
| HR1     | 540-581  |
| Loop    | 582-627  |
| HR2     | 628-661  |
| MPEP    | 662-684  |
| TM      | 685-704  |
| Endo    | 705-723  |
| KEN     | 724-745  |
| LLP2    | 746-790  |
| LLP3    | 791-828  |
| LLP1    | 829-856  |

**B**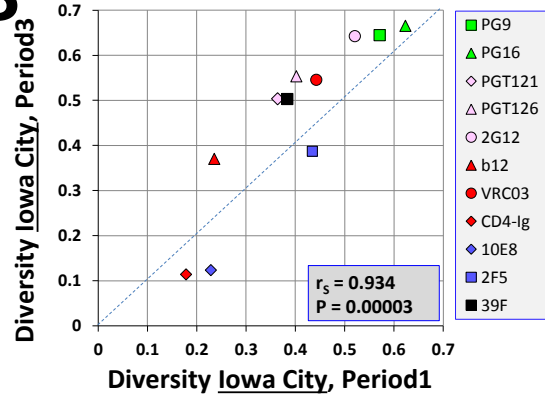

Supplement: pbio.2001549.s005.pdf [file pbio.2001549.s005.pdf]
