# Supplementary material for: Accurate predictions of population-level changes in sequence and structural properties of HIV-1 Env using a volatility-controlled diffusion model
Source: PubMed Central journal article supplement (PMC5383018; doi:10.1371/journal.pbio.2001549), 2017-04-06
Supplement: pbio.2001549.s006.pdf [file pbio.2001549.s006.pdf]

| Patient  | Length |       |       |       |       | PNGS  |       |       |       |       | Charge |       |       |       |       | Hydropathy |       |       |       |       |
|----------|--------|-------|-------|-------|-------|-------|-------|-------|-------|-------|--------|-------|-------|-------|-------|------------|-------|-------|-------|-------|
|          | V1     | V2    | V3    | V4    | V5    | V1    | V2    | V3    | V4    | V5    | V1     | V2    | V3    | V4    | V5    | V1         | V2    | V3    | V4    | V5    |
| IC.10048 | 0      | 0     | 0     | 0     | 0     | 0.049 | 0     | 0     | 0     | 0.049 | 0.471  | 0.018 | 0     | 0     | 0.471 | 0.061      | 0.015 | 0.009 | 0.006 | 0.037 |
| IC.10196 | 0.047  | 0     | 0     | 0     | 0.056 | 0.145 | 2E-16 | 0     | 0     | 0.054 | 1.224  | 2E-16 | 0.108 | 0     | 0.054 | 0.02       | 0     | 0.007 | 0     | 0.011 |
| IC.102   | 0      | 0     | 0     | 0     | 0     | 0.049 | 0     | 0     | 0     | 0     | 0      | 0     | 0     | 0     | 0     | 0.009      | 0.009 | 0     | 0     | 0     |
| IC.10213 | 0      | 0     | 0     | 0.02  | 0     | 1E-16 | 2E-16 | 0     | 0     | 0.143 | 0      | 2E-16 | 0     | 0.237 | 0.406 | 2E-16      | 0     | 1E-16 | 0.051 | 0.028 |
| IC.10259 | 0      | 0.014 | 0     | 0     | 0.119 | 0     | 0.205 | 0     | 0     | 0.109 | 0.217  | 0.014 | 0     | 0     | 0.496 | 0.029      | 0.009 | 0     | 0     | 0.012 |
| IC.1036  | 0.23   | 0     | 0     | 0     | 0.124 | 0.147 | 0     | 0     | 0     | 0.143 | 0.467  | 2     | 0.065 | 0     | 0.14  | 0.023      | 0.014 | 0.016 | 0     | 0.031 |
| IC.10419 | 0      | 0     | 0     | 0     | 0     | 0     | 0     | 0     | 0     | 0.471 | 1.414  | 0     | 0     | 0     | 1.414 | 0.015      | 0     | 0     | 0     | 0.054 |
| IC.10473 | 0      | 0     | 0.017 | 0.123 | 0     | 0     | 0     | 0.017 | 0.238 | 2E-16 | 0      | 0     | 0.017 | 0.238 | 0.466 | 0          | 0.013 | 0.003 | 0.01  | 0.066 |
| IC.11100 | 0      | 0     | 0     | 0.033 | 0     | 0     | 0     | 0     | 0     | 0.277 | 0.298  | 0     | 0     | 0.153 | 0.176 | 1.156      | 0     | 0.006 | 0.039 | 0.094 |
| IC.1125  | 0      | 0.013 | 0     | 0.072 | 0     | 0     | 0.014 | 0     | 0.014 | 0     | 1.491  | 0.013 | 0.077 | 0.203 | 0     | 0.03       | 0.014 | 0.012 | 0.019 | 0     |
| IC.1211  | 0.293  | 0.045 | 0     | 0     | 0.065 | 0.065 | 0.205 | 1E-16 | 0.073 | 0.291 | 0.216  | 0     | 0.06  | 0.318 | 1.438 | 0.038      | 0.008 | 0.004 | 0.007 | 0.036 |
| IC.1240  | 0.06   | 0.08  | 0     | 0.017 | 0     | 0.417 | 0.4   | 0     | 0.017 | 2E-16 | 0.066  | 0.448 | 0     | 0.358 | 1.742 | 0.029      | 0.035 | 0.016 | 0.032 | 0.048 |
| IC.1260  | 0.025  | 0     | 0     | 0.109 | 0     | 0.025 | 0     | 0     | 0.177 | 0.298 | 0.298  | 0     | 0     | 0.109 | 1.414 | 0.031      | 0.007 | 0     | 0.021 | 0.033 |
| IC.1329  | 0.408  | 0.042 | 0     | 0     | 0     | 0     | 0.408 | 0     | 0.414 | 2E-16 | 1.742  | 1     | 0.108 | 1     | 0.466 | 0.039      | 0.009 | 0.023 | 0.018 | 0.004 |
| IC.1331  | 0.031  | 0     | 0     | 0.032 | 0.049 | 0.146 | 0     | 0     | 0.031 | 0.047 | 2      | 0     | 0     | 0.465 | 0     | 0.057      | 0.008 | 0.021 | 0.008 | 0.143 |
| IC.1378  | 0      | 0.011 | 0     | 0     | 0     | 0     | 0.011 | 0     | 0     | 0.046 | 0.466  | 0.046 | 0.217 | 0.466 | 0.031 | 0.005      | 0.02  | 0.021 | 0.136 | 0     |
| IC.1386  | 0.027  | 0.045 | 0     | 0     | 0.129 | 0.027 | 0.14  | 0     | 0     | 0.129 | 14.57  | 0.14  | 0.157 | 0     | 1.414 | 0.012      | 0.029 | 0.023 | 0.008 | 0.024 |
| IC.193   | 0      | 0     | 0     | 0     | 0     | 0     | 0     | 0     | 0     | 0     | 0.346  | 1.752 | 2E-16 | 0     | 0     | 4E-04      | 0.007 | 0     | 0     | 2E-16 |
| IC.2     | 0      | 0.068 | 0     | 0.074 | 0     | 0.147 | 0.062 | 1E-16 | 0.057 | 0.146 | 0      | 0.446 | 0     | 0.071 | 0.466 | 0.021      | 0.023 | 0.005 | 0.057 | 0.131 |
| IC.20476 | 0.141  | 0.018 | 0     | 0     | 0     | 0.141 | 0.018 | 0     | 0     | 0     | 0.466  | 0.018 | 0.202 | 0.466 | 0     | 0.029      | 0.016 | 0.018 | 0.04  | 0.205 |
| IC.206   | 0      | 0.031 | 0.06  | 0     | 0     | 0     | 0.031 | 0.06  | 0     | 0     | 0      | 0.031 | 0.235 | 0.235 | 0.467 | 0.026      | 0.015 | 0.016 | 0.031 | 0.015 |
| IC.239   | 0.051  | 0     | 0     | 0.038 | 0     | 0.053 | 0.217 | 0     | 0.117 | 2E-16 | 0.466  | 2E-16 | 2E-16 | 0.267 | 2E-16 | 0.017      | 0.003 | 0.022 | 0.032 | 0     |
| IC.241   | 0      | 0.035 | 0     | 0     | 0     | 0     | 0.446 | 0     | 0     | 0     | 0.471  | 0.035 | 0     | 0     | 0     | 0.055      | 0.042 | 0     | 0     | 0     |
| IC.246   | 0.069  | 0.013 | 0     | 0.009 | 0     | 0.069 | 0.013 | 0     | 0.009 | 0     | 0.434  | 0.137 | 0.133 | 0.466 | 0     | 0.073      | 0.022 | 0.002 | 0.052 | 0.002 |
| IC.253   | 0      | 0.035 | 0     | 0     | 0.074 | 0     | 0.035 | 0     | 0     | 0.466 | 0      | 0.035 | 0     | 0     | 14.57 | 0          | 0.008 | 0.029 | 0.049 | 0.045 |
| IC.277   | 0.049  | 0     | 0     | 0     | 0.043 | 0.12  | 0     | 0     | 0     | 0.044 | 0.414  | 0     | 0.106 | 1.491 | 0.733 | 0.008      | 0     | 0.014 | 0.024 | 0.146 |
| IC.295   | 0      | 0.019 | 0     | 0.039 | 0     | 0     | 0.019 | 0     | 0.039 | 0     | 0      | 0.019 | 0.129 | 0.275 | 0     | 0          | 0.01  | 0.01  | 0.072 | 0     |
| IC.30048 | 0      | 0     | 0     | 0.019 | 0     | 0.146 | 0.208 | 0     | 0.14  | 0     | 0      | 0     | 0.118 | 0.77  | 0     | 0.045      | 0.008 | 0.015 | 0.033 | 0     |
| IC.30281 | 0      | 0     | 0     | 0     | 0.06  | 1E-16 | 0.055 | 0     | 0     | 0.062 | 0      | 0.047 | 0     | 0.217 | 0     | 0          | 0.007 | 0     | 0.002 | 0.023 |
| IC.35    | 0      | 0.012 | 0     | 0.039 | 0.184 | 0.146 | 0.235 | 0     | 0.1   | 0.466 | 1.742  | 0.14  | 0     | 0.09  | 1.742 | 0.032      | 0.032 | 0.01  | 0.059 | 0.146 |
| IC.387   | 0      | 0     | 0     | 0     | 0     | 2E-16 | 0     | 0     | 0     | 0     | 0      | 0     | 0     | 2E-16 | 0     | 2E-16      | 0.003 | 0     | 1E-16 | 1E-16 |
| IC.389   | 0      | 0     | 0     | 0.037 | 0.054 | 0     | 2E-16 | 0     | 0.038 | 0.054 | 0      | 0     | 2E-16 | 0.434 | 0.521 | 0          | 0.007 | 0     | 0.049 | 0.06  |
| IC.404   | 0.028  | 0.043 | 0     | 0     | 0     | 0.028 | 0.203 | 0     | 0     | 2E-16 | 0.466  | 0.127 | 0     | 0     | 2E-16 | 0.009      | 0.013 | 0     | 1E-16 | 0.015 |
| IC.450   | 0.022  | 0     | 0     | 0.019 | 0     | 0.023 | 0.446 | 0     | 0.13  | 0     | 0.471  | 0.046 | 0.235 | 0.466 | 1.742 | 0.024      | 0.015 | 0.011 | 0.039 | 0.016 |
| IC.451   | 0.042  | 0     | 0     | 0     | 0.127 | 0.275 | 0     | 0     | 0.26  | 0.25  | 1.742  | 0     | 0     | 0.266 | 0.466 | 0.074      | 0.003 | 0.009 | 0.002 | 0.13  |
| IC.454   | 0.146  | 0.017 | 0     | 0.02  | 0     | 0.033 | 0.017 | 0     | 0.008 | 0     | 0.357  | 0     | 0     | 0.733 | 0     | 0.063      | 0.012 | 0.038 | 0.047 | 0     |
| IC.461   | 0.104  | 0.052 | 0     | 0.13  | 0.091 | 0.066 | 0.203 | 0     | 0.132 | 0.147 | 0.466  | 0.129 | 0.266 | 0.266 | 1.432 | 0.049      | 0.06  | 0.027 | 0.07  | 0.146 |
| IC.465   | 0.031  | 0     | 0     | 0     | 0     | 0.031 | 0     | 0     | 0     | 0     | 0      | 0     | 0.109 | 0.266 | 0     | 0.015      | 0.01  | 0.038 | 0.061 | 0     |
| IC.472   | 0      | 0     | 0     | 0     | 0     | 0     | 0     | 0     | 0     | 0     | 0      | 0     | 0     | 0     | 0     | 0.02       | 0     | 0     | 0     | 0     |
| IC.479   | 0      | 0     | 0     | 0     | 0.133 | 0     | 2E-16 | 0     | 0.134 | 0.411 | 0      | 0.434 | 0.217 | 0.217 | 0.466 | 0.024      | 0.027 | 0.014 | 0.011 | 0.091 |
| IC.525   | 0.021  | 0.055 | 0     | 0     | 0.061 | 0.141 | 0.466 | 0     | 0.283 | 0.061 | 0.453  | 1.414 | 0     | 0.271 | 1.414 | 0.036      | 0.061 | 0     | 0.012 | 0.056 |
| IC.534   | 0      | 0     | 0     | 0.016 | 0.049 | 0.229 | 0.208 | 0     | 0.017 | 0.047 | 0.266  | 0.4   | 0     | 0.275 | 1.466 | 0.011      | 0.032 | 0     | 0.034 | 0.049 |
| IC.606   | 0.133  | 0     | 0     | 0     | 0     | 0.126 | 0     | 0     | 0     | 0     | 0.133  | 0     | 0     | 0     | 1.414 | 0.049      | 0     | 0.005 | 0     | 0.024 |
| IC.616   | 0.063  | 0     | 0     | 0.139 | 0.056 | 0.191 | 2E-16 | 0     | 0.135 | 0.171 | 0.063  | 1.466 | 0.23  | 1.367 | 0.466 | 0.079      | 0.015 | 0.022 | 0.021 | 0.068 |
| IC.629   | 0.059  | 0.022 | 0     | 0.029 | 0     | 0.144 | 0.208 | 0     | 0.138 | 0     | 0.466  | 0.253 | 0.212 | 17.46 | 0     | 0.058      | 0.041 | 0.02  | 0.02  | 0     |
| IC.660   | 0      | 0     | 0     | 0     | 0     | 0     | 0     | 1E-16 | 0.138 | 2E-16 | 0      | 0     | 0     | 1     | 2E-16 | 0          | 0     | 0     | 0.013 | 0     |
| IC.665   | 0.072  | 0.046 | 0     | 0     | 0.048 | 0.143 | 0.466 | 0.466 | 0.266 | 0.143 | 0.239  | 0.202 | 0.16  | 0.275 | 0.466 | 0.06       | 0.031 | 0.032 | 0.029 | 0.054 |
| IC.684   | 0.213  | 0     | 0     | 0     | 0     | 0.41  | 0     | 0     | 0     | 0     | 0      | 0     | 0     | 0.266 | 0.266 | 0.035      | 0     | 0     | 0.027 | 0.026 |
| IC.689   | 0.027  | 0.026 | 0     | 0     | 0.233 | 0.449 | 0.027 | 0     | 0     | 0.141 | 2      | 0.466 | 0     | 0     | 0.471 | 0.036      | 0.049 | 0.013 | 0     | 0.06  |
| IC.711   | 0      | 0     | 0     | 0     | 0     | 0     | 0     | 0     | 0.244 | 0     | 0      | 0     | 0     | 0     | 0     | 0          | 0     | 0.006 | 0.025 | 0     |
| IC.736   | 0.127  | 0     | 0.015 | 0.086 | 0.037 | 0.037 | 0     | 0.015 | 0.035 | 0.299 | 1.466  | 0.213 | 0.109 | 1.224 | 0.213 | 0.028      | 0.015 | 0.03  | 0.037 | 0.081 |
| IC.797   | 0      | 0     | 0     | 0     | 0.145 | 0.146 | 0     | 0     | 0.238 | 0.143 | 0.142  | 2     | 0.061 | 0.266 | 2     | 0.032      | 0.009 | 0.018 | 0.017 | 0.037 |
| IC.818   | 0      | 0     | 0     | 0     | 0.051 | 0     | 2E-16 | 0     | 0     | 0.277 | 0      | 0     | 0     | 0     | 0.049 | 0          | 0.004 | 0     | 0.004 | 0.113 |
| IC.857   | 0.054  | 0.091 | 0     | 0.231 | 0.056 | 0.089 | 0.231 | 0.346 | 0.05  | 0.465 | 0.21   | 0.088 | 0.266 | 0.271 | 1.742 | 0.114      | 0.044 | 4E-04 | 0.046 | 0.039 |
| IC.912   | 0      | 0     | 0     | 0     | 0     | 0     | 0     | 0     | 0     | 0.266 | 0      | 0     | 0     | 0     | 1.156 | 0          | 0.003 | 0.015 | 0.003 | 0.096 |
| IC.940   | 0      | 0     | 0     | 0     | 0     | 0     | 0     | 0     | 0     | 0     | 0      | 0     | 0     | 0     | 0     | 0          | 0.004 | 0.006 | 0     | 0     |
| IC.999   | 0.02   | 0     | 0     | 0     | 0     | 0.133 | 0     | 0     | 0     | 0     | 1.156  | 0     | 0     | 2     | 0     | 0.056      | 0     | 0.016 | 0.011 | 0.014 |
| IC.JCP   | 0      | 0.056 | 0.017 | 0     | 0.047 | 0.147 | 0.057 | 0.017 | 0.266 | 0.146 | 1.742  | 0.04  | 0.108 | 0.147 | 0.046 | 0.053      | 0.008 | 0.005 | 0.04  | 0.053 |
| IC.JJM   | 0      | 0     | 0     | 0     | 0     | 0     | 0     | 0     | 0.203 | 0     | 0.266  | 0.266 | 0     | 0.238 | 0     | 0.018      | 0.006 | 0.007 | 0.011 | 0     |
| IC.REH   | 0.031  | 0     | 0     | 0     | 0     | 0.12  | 0     | 0     | 0     | 0     | 0.088  | 0.047 | 0     | 0     | 0     | 0.036      | 0.006 | 0     | 0.004 | 0     |
