# Supplementary material for: Accurate predictions of population-level changes in sequence and structural properties of HIV-1 Env using a volatility-controlled diffusion model
Source: PubMed Central journal article supplement (PMC5383018; doi:10.1371/journal.pbio.2001549), 2017-04-06

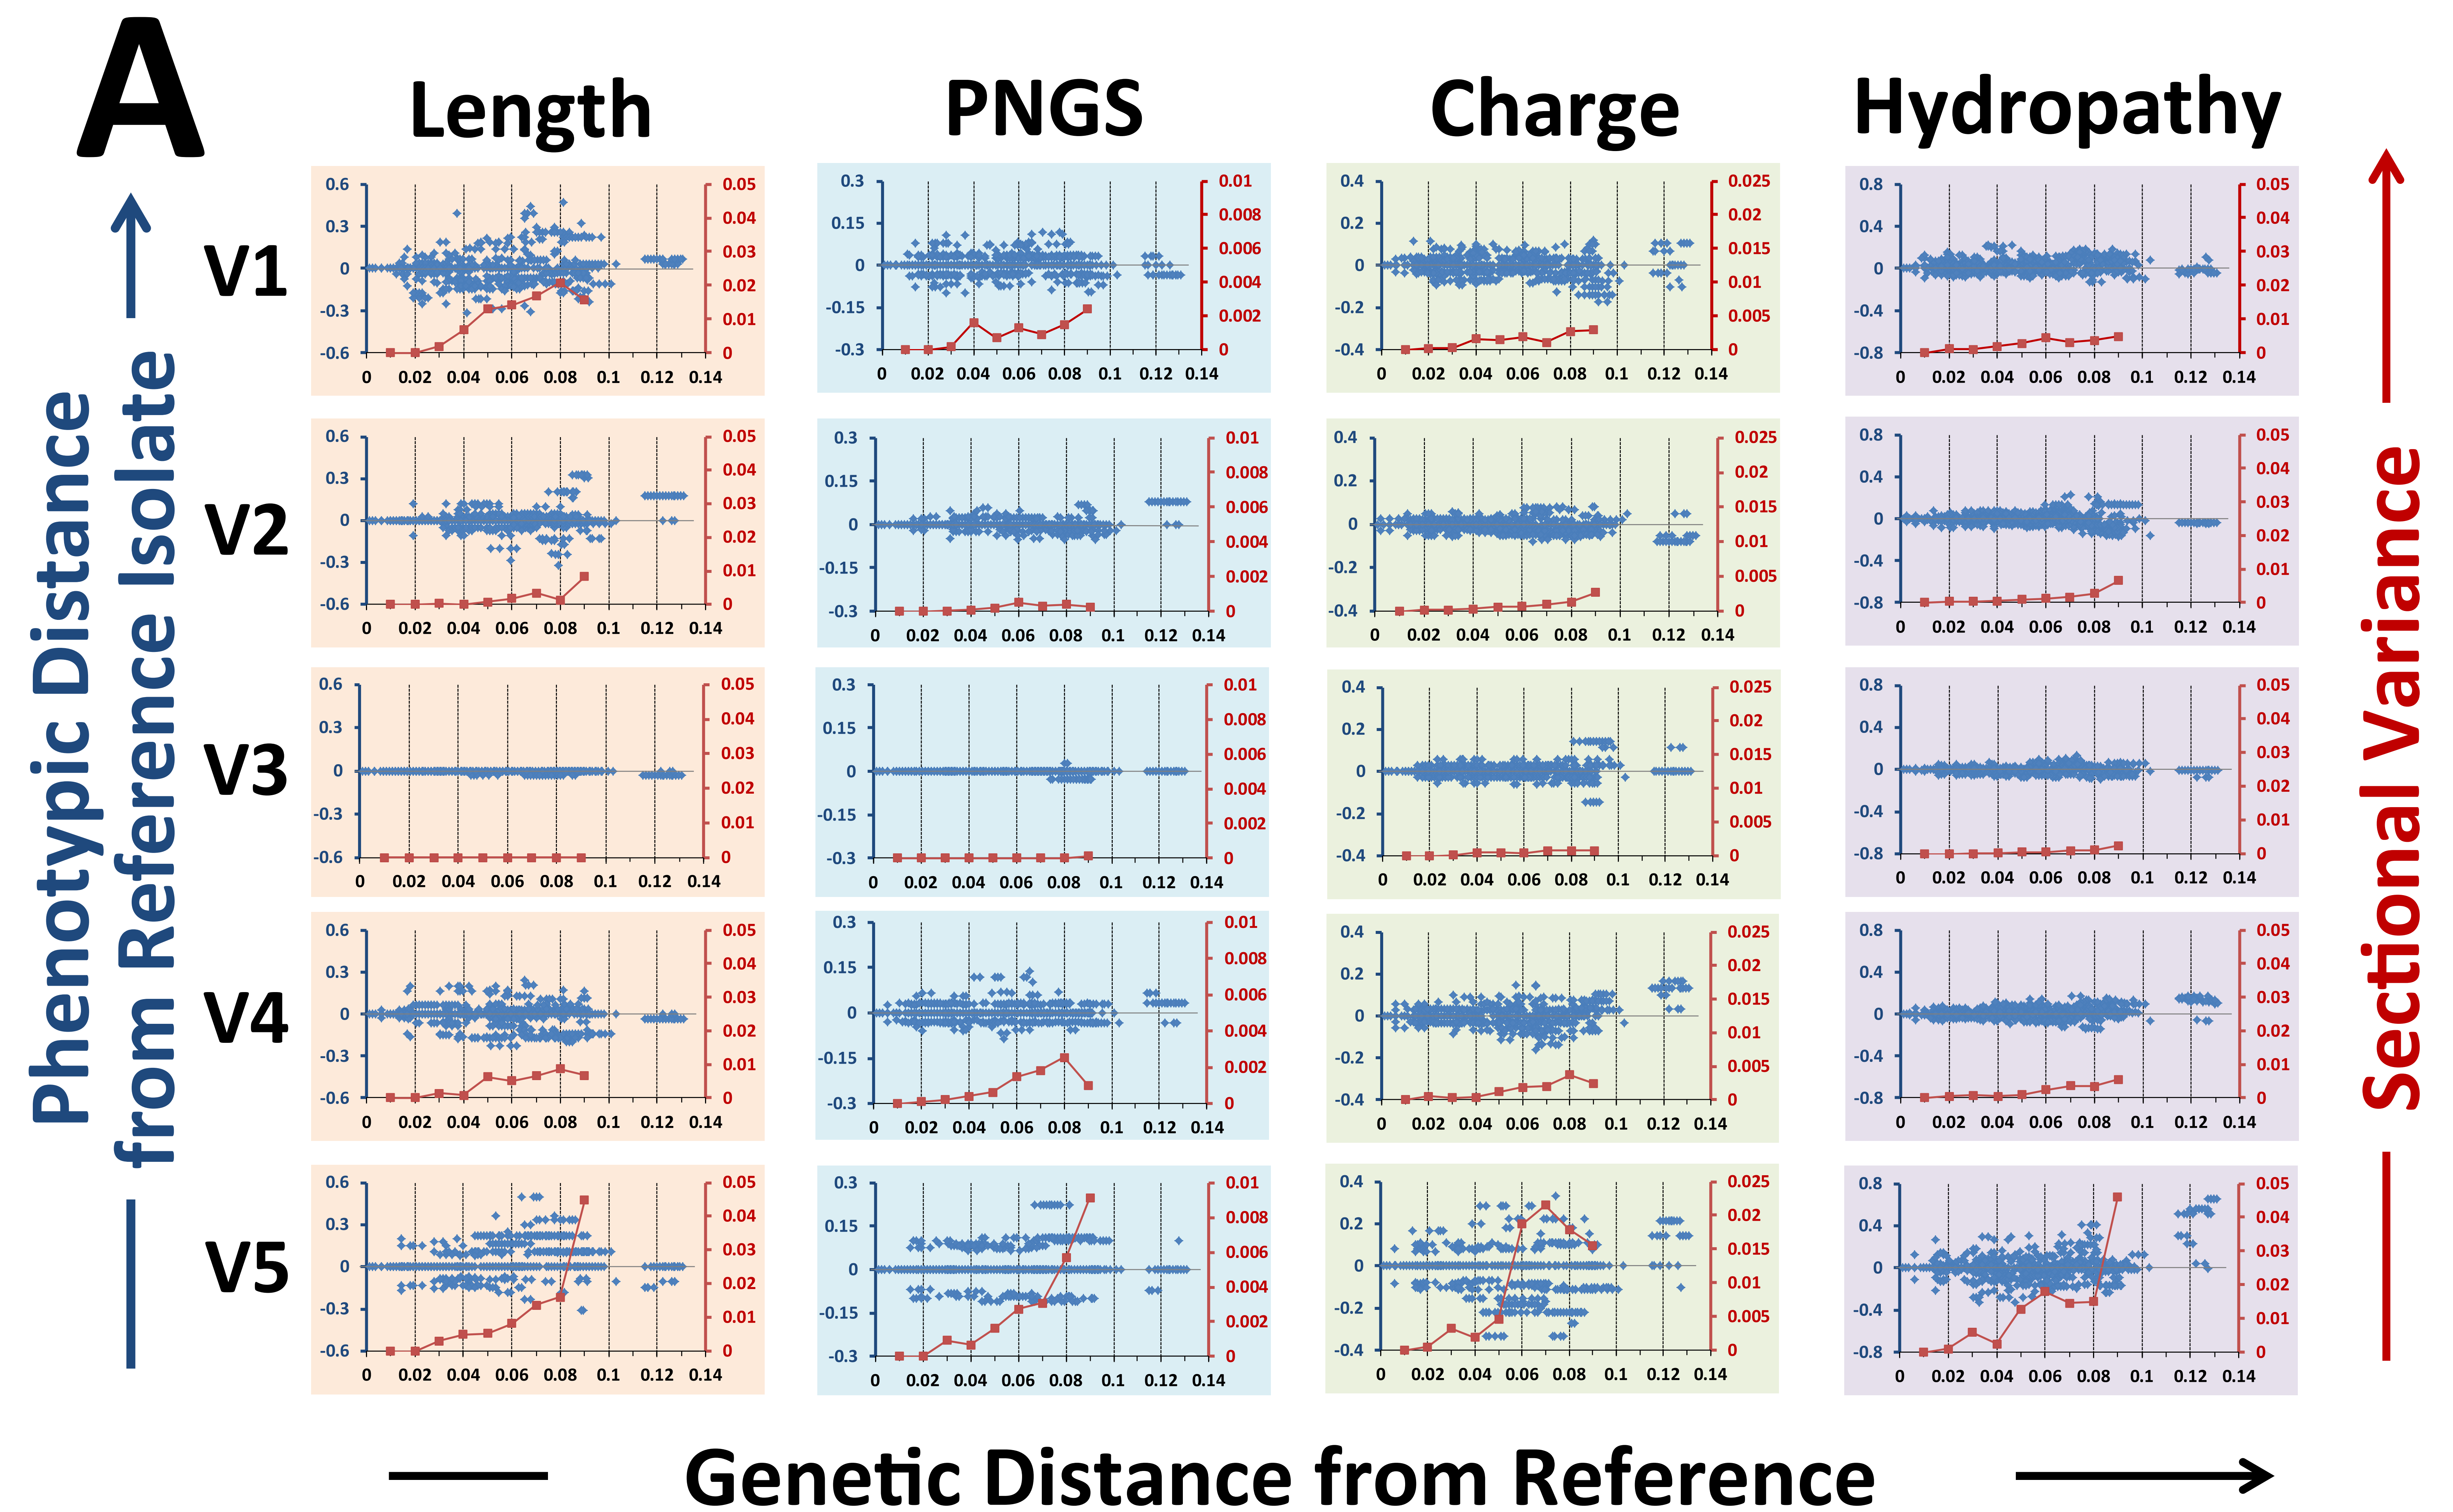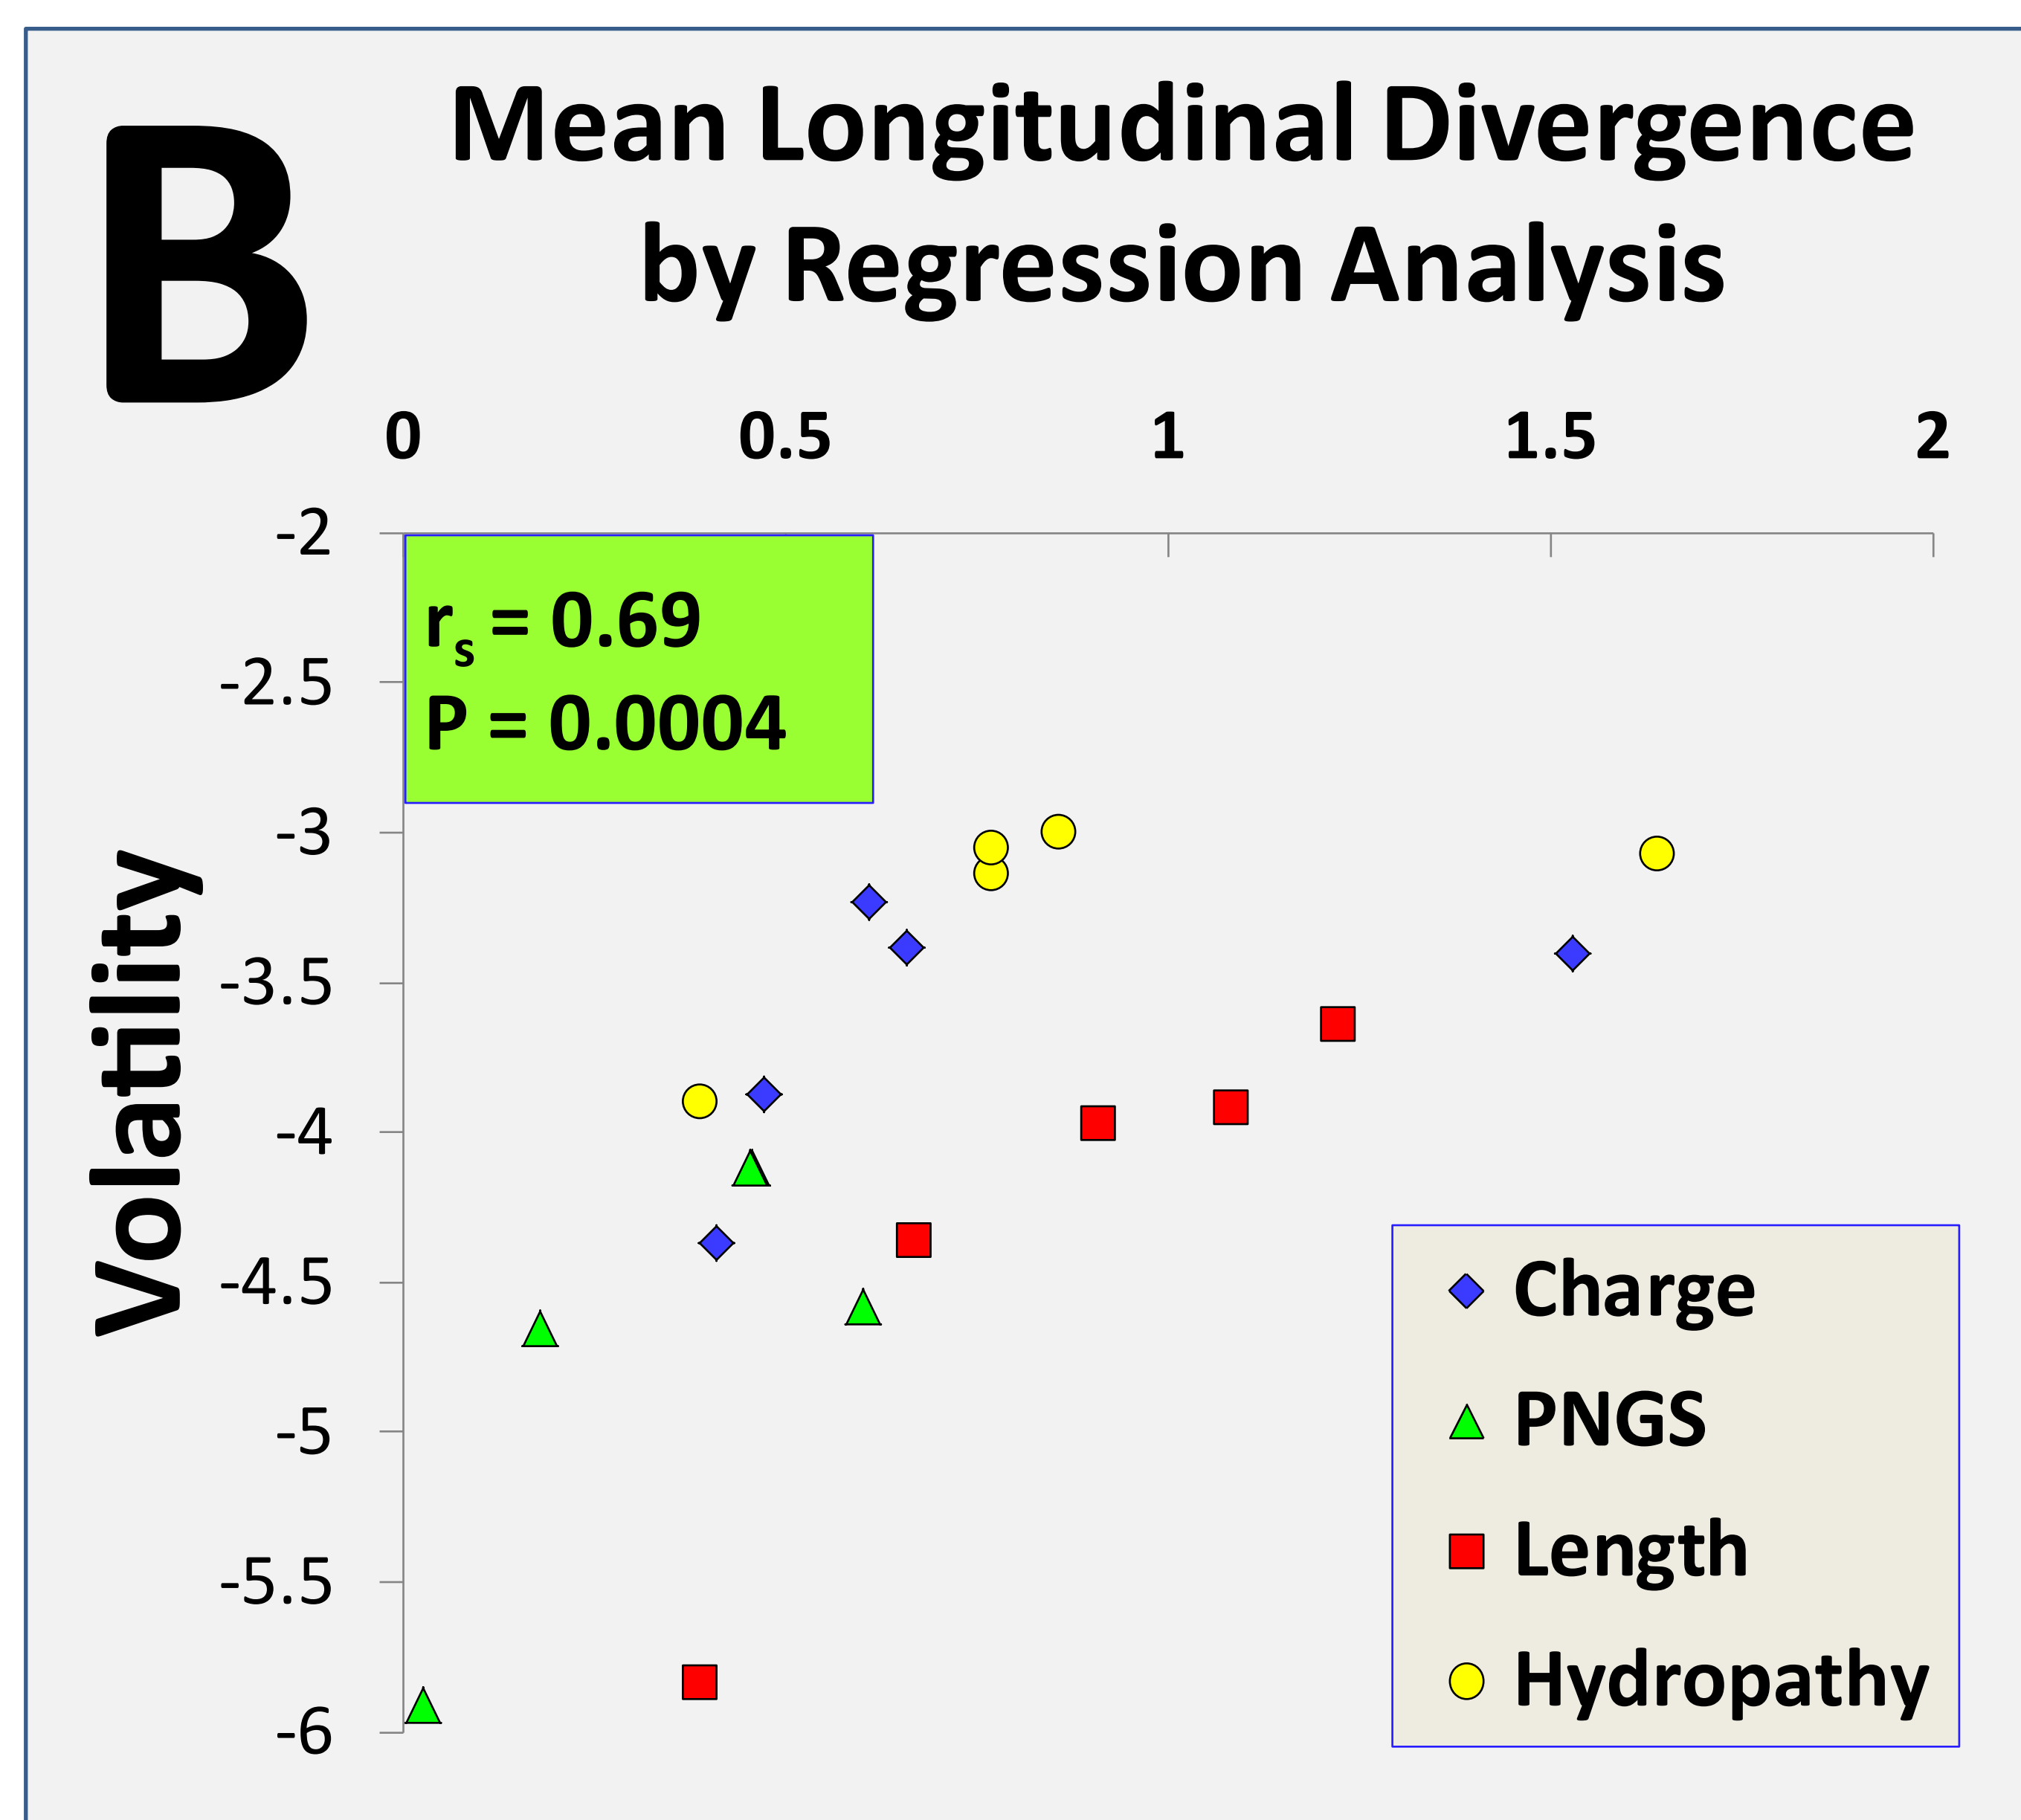

Supplement: pbio.2001549.s009.pdf [file pbio.2001549.s009.pdf]
