# Supplementary material for: Accurate predictions of population-level changes in sequence and structural properties of HIV-1 Env using a volatility-controlled diffusion model
Source: PubMed Central journal article supplement (PMC5383018; doi:10.1371/journal.pbio.2001549), 2017-04-06
Supplement: pbio.2001549.s013.pdf [file pbio.2001549.s013.pdf]

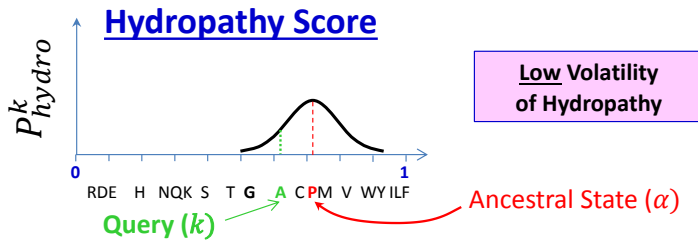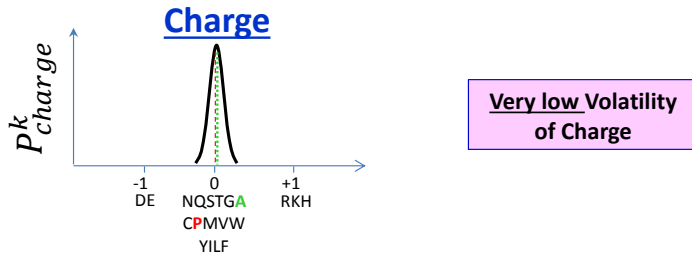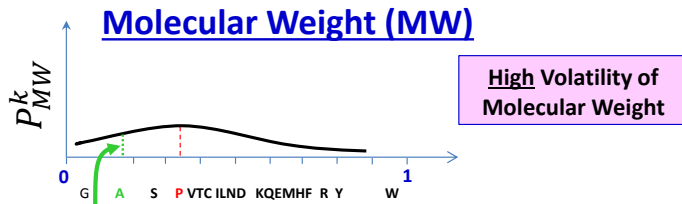

$$P_{Total}^{Ala} = P_{hydro}^{Ala} \cdot P_{charge}^{Ala} \cdot P_{MW}^{Ala}$$

$$P_{MW}^{Ala} = f(x_{MW} | \alpha_{MW}, V_{MW}) = \frac{1}{\sqrt{2\pi V_{MW}}} e^{-\frac{(x_{MW}^{Ala} - \alpha_{MW})^2}{2V_{MW}}}$$
