# Supplementary material for: Accurate predictions of population-level changes in sequence and structural properties of HIV-1 Env using a volatility-controlled diffusion model
Source: PubMed Central journal article supplement (PMC5383018; doi:10.1371/journal.pbio.2001549), 2017-04-06
Supplement: pbio.2001549.s014.pdf [file pbio.2001549.s014.pdf]

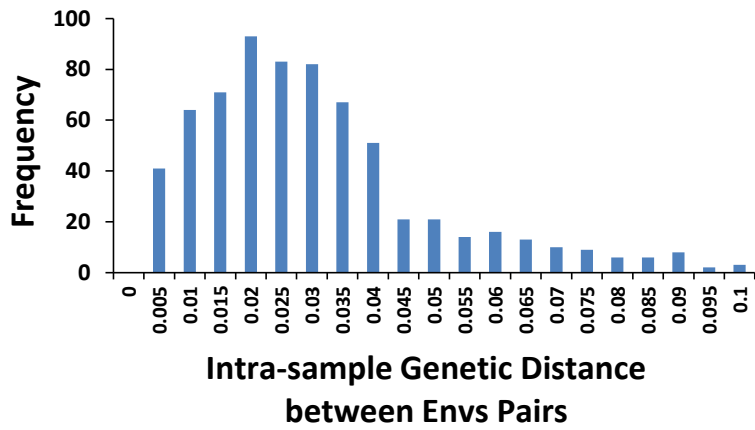

|                  |         |
|------------------|---------|
| Number of values | 682     |
| Minimum          | 0.00115 |
| Median           | 0.02423 |
| Maximum          | 0.1103  |
| Mean             | 0.02826 |
| Std. Deviation   | 0.01951 |

|                      |         |
|----------------------|---------|
| Lower 95% CI of mean | 0.02679 |
| Upper 95% CI of mean | 0.02972 |

|                                                               |          |
|---------------------------------------------------------------|----------|
| <b><u>D'Agostino &amp; Pearson omnibus normality test</u></b> |          |
| K <sup>2</sup>                                                | 142      |
| P value                                                       | < 0.0001 |
| Passed normality test (alpha=0.05)?                           | No       |
